# Supplementary material for: Effect of Telehealth Extended Care for Maintenance of Weight Loss in Rural US Communities: A Randomized Clinical Trial
Source: PubMed Central journal article supplement (PMC7296388; doi:10.1001/jamanetworkopen.2020.6764), 2020-06-15
Supplement: jamanetwopen-3-e206764-s001.pdf [file jamanetwopen-3-e206764-s001.pdf]

1  
2  
3  
4  
5  
6  
7

Supplemental Material

Supplement 1. Trial Protocol

8                   **Protocol of the Rural Lifestyle Eating and Activity (Rural LEAP) Trial**

9

10 **Principal Investigator:**       Michael G. Perri, PhD<sup>a</sup>  
11 **Co-Investigators:**           Marian C. Limacher, MD<sup>a</sup>  
12                                       David M. Janicke, PhD<sup>a</sup>  
13                                       Kathryn M. Ross, PhD<sup>a</sup>  
14                                       Linda B. Bobroff, PhD<sup>a</sup>  
15                                       A. Daniel Martin, PhD<sup>a</sup>  
16                                       Christie A. Befort, PhD<sup>b</sup>  
17 **Statistician:**                   Michael J. Daniels, ScD<sup>a</sup>  
18 **Health Economist:**           Tiffany A. Radcliff, PhD<sup>c</sup>  
19 **Project Coordinator:**       Meena N. Shankar, MS, RD<sup>a</sup>

20

21 <sup>a</sup> University of Florida, P.O. Box 100185, Gainesville, FL 32610 USA

22 <sup>b</sup> University of Kansas Medical Center, 3901 Rainbow Blvd., Kansas City, KS 66160 USA

23 <sup>c</sup> Texas A&M University, 212 Adriance Lab Rd., College Station, TX 77843 USA

24

25 **Clinical trial number:** NCT02054624 on ClinicalTrials.gov

26 **Acknowledgement:** This work was supported by NHLBI grant R18 HL112720.

27

28

29

30

31  
32  
33  
34  
35  
36  
37  
38  
39  
40  
41  
42  
43  
44  
45  
46  
47  
48  
49  
50  
51  
52  
53  
54

### **Abstract**

Obesity is a major contributor to the greater prevalence of chronic disease morbidity and mortality observed in rural versus nonrural areas of the U.S. Nonetheless, little research attention has been given to modifying this important driver of rural/urban disparities in health outcomes. Although lifestyle treatments produce weight reductions of sufficient magnitude to improve health, the existing research is limited with respect to the long-term maintenance of treatment effects and the dissemination of services to underserved populations. Recent studies have demonstrated the feasibility of delivering lifestyle programs through the infrastructure of the U.S. Cooperative Extension Service (CES), which has more than 2,900 offices nationwide and whose mission includes nutrition education and health promotion. In addition, several randomized trials have shown that supplementing lifestyle treatment with extended-care programs consisting of either face-to-face sessions or individual telephone counseling can improve the maintenance of weight loss. However, both options entail relatively high costs that inhibit adoption in rural communities. The delivery of extended care via group-based telephone intervention may represent a promising, cost-effective alternative that is well suited to rural residents who tend to be isolated, have heightened concerns about privacy, and report lower quality of life. The Rural Lifestyle Eating and Activity Program (Rural LEAP) is a randomized trial, conducted via CES offices in rural communities, targeted to adults with obesity (n=540), and designed to evaluate the effectiveness and cost-effectiveness of extended-care programs delivered via group or individual telephone counseling compared to an education control condition on long-term changes in body weight.

## 55 1. Introduction

56 Obesity disproportionately affects Americans living in rural areas and contributes to  
57 higher prevalences of chronic diseases and all-cause mortality observed in rural versus nonrural  
58 communities [1-6]. In rural areas, the convergent effects of poverty, low educational attainment,  
59 limited access to preventive health services, and cultural factors regarding diet and exercise  
60 contribute to higher rates of obesity and associated diseases [7-13].

61 Weight loss can reverse many of the adverse consequences linked to obesity [14].  
62 According to national guidelines [15] and literature reviews [16-20], the most effective means of  
63 achieving weight reductions at the individual level is comprehensive lifestyle treatment.  
64 Participants in lifestyle interventions are taught behavioral strategies (e.g., goal setting and self-  
65 monitoring) to modify their eating and physical activity patterns so as to produce a negative  
66 energy balance and weight loss. Comprehensive lifestyle treatment routinely results in weight  
67 losses of 5-10% [16-20]. Reductions of this magnitude can produce beneficial effects on  
68 hypertension, glucose intolerance, and hyperlipidemia, and can prevent the onset of type 2  
69 diabetes [15,21-23].

70 The limited availability of obesity treatment options in rural communities prevents many  
71 residents from engaging in weight-control efforts [24]. With a nationwide network of more than  
72 2,900 offices and a mission that includes nutrition education and health promotion, the  
73 Cooperative Extension Service (CES) [25,26] has the potential to play an important role in  
74 providing treatment for obesity in rural communities.

75 While lifestyle interventions can produce clinically meaningful weight reductions, the  
76 long-term maintenance of those losses remains a challenge. Without follow-up care,  
77 participants commonly regain one-third to one-half of their initial weight loss within one year  
78 [18,27-31]. Providing extended care via face-to-face sessions improves long-term outcomes  
79 [28,32], but is time- and cost-intensive [29,33,34], thereby limiting adoption in low-resources

80 settings. Delivering extended care via telephone counseling may decrease the burdens  
81 associated with face-to-face treatment while producing equivalent weight-loss outcomes [35].

82 Most studies supporting phone-based interventions (e.g., [31,35]) have utilized *individual*  
83 telephone counseling, which requires a significant amount of provider time and consequently  
84 poses a major barrier to widespread implementation. Group-based phone counseling may  
85 overcome this challenge, but evidence of its effectiveness is limited. Befort and colleagues [36]  
86 found that group phone counseling produced weight losses equivalent to individual phone  
87 counseling, but at lower costs, and in a subsequent trial [37] showed that extended care  
88 delivered via group phone counseling improved weight-loss maintenance compared with a  
89 newsletter control group. In an efficacy study conducted largely with urban participants,  
90 Donnelly et al. [38] found equivalent outcomes for lifestyle treatment delivered via face-to-face  
91 sessions versus group conference call counseling. However, the impact of extended-care  
92 interventions delivered via group- versus individual telephone counseling in less resourced, rural  
93 areas remains unknown.

94 The Rural Lifestyle Eating and Activity Program (Rural LEAP) is a randomized trial  
95 designed to evaluate the comparative effectiveness and cost efficiency of three methods of  
96 delivering extended-care counseling for weight-loss maintenance in rural communities. The  
97 intervention will be delivered through the infrastructure of the CES, and the primary outcome is  
98 weight change over the course of 18 months following initial treatment.

## 99 **2. Methods**

### 100 **2.1. Overview**

101 The study will consist of three distinct phases: (1) Phase I, a non-randomized 4-month  
102 weight-loss phase (Months 1 through 4) during which all participants receive the same face-to-  
103 face group lifestyle intervention for weight loss; (2) Phase II, a 12-month extended-care phase  
104 (Months 5 through 16) during which participants receive additional treatment according to  
105 randomized assignment to group-based (GRP) phone counseling, individual-based (IND) phone

106 counseling, or an education control (CTRL) group; and (3) Phase III, a 6-month no-contact  
107 follow-up period (Months 17 through 22).

## 108 **2.2. Participants**

109 The study was approved by the Institutional Review Board of the University of Florida.  
110 Participants will include 540 adults, 21-75 years of age, with body mass indices (BMI) of 30-45  
111 kg/m<sup>2</sup>. Eligible participants will be free of uncontrolled diabetes and hypertension and had no  
112 active manifestations of cardiovascular, cerebrovascular, renal, or hepatic disease. Exclusion  
113 criteria included the use of medications known to affect body weight, musculoskeletal conditions  
114 that precluded walking for 30 minutes, and weight loss > 4.5 kg in the preceding 6 months.  
115 Psychosocial contraindications included clinically significant depression and substance abuse.

## 116 **2.3. Recruitment and Screening**

117 Study announcements will be mailed to residential addresses within 14 rural counties in  
118 northern Florida [39]. All 14 counties are designated in whole or in part as “Health Professional  
119 Shortage Areas” [40]. In response to the mailings and other outreach activities (e.g.,  
120 presentations at churches and community events), interested adults will complete a preliminary  
121 telephone screening to determine if they meet basic eligibility criteria for study participation. An  
122 in-person screening visit will then then conducted at a local CES site during which the study will  
123 be described and informed consent obtained. At the screening visit, a medical history will be  
124 collected, and a study nurse will measure the potential participant’s height, weight, and resting  
125 blood pressure, and a fasting blood sample will be drawn and analyzed for metabolic and lipid  
126 profiles. Following review of the screening visit results, individuals who meet the eligibility  
127 criteria will be enrolled into Phase I of the study.

## 128 **2.4. CES Offices and Interventionists**

129 The initial weight-loss intervention will be delivered on site via CES sites in 14 rural  
130 counties in northern Florida. All 14 counties have a centrally-located site available for the  
131 intervention. Interventionists are CES Family and Consumer Sciences Agents or individuals

132 with a bachelor's or master's degree in nutrition, exercise science, or psychology. All  
133 interventionists will be provided with training in lifestyle treatment and nutrition education that  
134 includes two 8-hour workshops held semi-annually, plus case management reviews with a  
135 clinical health psychologist (MGP) or registered dietitian (MNS), each with extensive experience  
136 overseeing behavioral interventions for obesity. The case management reviews are conducted  
137 weekly during Months 1 through 4, biweekly during Months 5 through 10, and monthly during  
138 Months 11 through 16. Interventions sessions are audio-taped and random reviews are carried  
139 out to ensure treatment fidelity. Corrective feedback is provided during training, case  
140 management reviews, or individually with the interventionists.

#### 141 ***2.5. Phase I Lifestyle Intervention***

142 Phase I will consist of 16 weekly face-to-face group sessions conducted at local CES  
143 offices. Each group will consist of 4-16 participants, and each session will last approximately 90  
144 minutes. Intervention content was derived from the Diabetes Prevention Program (DPP)  
145 [42,43]. Modifications to the DPP approach include group rather than individual counseling [44]  
146 and home-based rather than center-based physical activity [45]. The DPP intervention was  
147 further modified to address weight-management challenges experienced by individuals living in  
148 rural areas (i.e., lack of places to exercise, traditions of high-fat Southern cooking, absence of  
149 social support for weight loss, etc.). Similar to the DPP, the Rural LEAP intervention is guided  
150 by social-cognitive and self-regulation theories [46-48], and it incorporates key behavioral  
151 modification strategies including goal setting, self-monitoring of dietary intake and physical  
152 activity, stimulus control, cognitive restructuring, and problem solving [33]. Utilization of  
153 problem-solving skills, in particular, is emphasized as a way to address the specific challenges  
154 experienced by adults living in rural communities [49,50]. Topics and objectives for the 16  
155 Phase I and 18 Phase II weight-loss treatment modules are presented in Table 2.

156 The goals of the initial lifestyle intervention are to decrease caloric intake in a  
157 nutritionally sound manner [51-53] so as to produce a weight loss of approximately 0.4-0.9 kg

158 per week and to increase home-based walking to 210 minutes per week [54]. Initial caloric  
159 intake goals are determined by the participant's baseline weight (e.g., 1200 kcal/day for  
160 participants weighing  $\leq$  113.6 kg; 1500 kcal/day for those weighing  $>$  113.6 kg). Participants will  
161 be instructed to keep daily logs of their food and drink intake, including the types and amounts  
162 of foods consumed along with corresponding caloric values, using either written logs or online  
163 programs/applications (e.g., MyFitnessPal<sup>®</sup> or Lose It!<sup>®</sup>). Participants will also be instructed to  
164 keep daily records of their steps using a pedometer or activity monitor. To support these self-  
165 monitoring efforts, participants will be provided, at no cost, with a *Calorie King* reference book  
166 [55,56], blank food logs, measuring cups, a food scale, and a clip-on pedometer. As a  
167 substitute for the use of a pedometer, participants will be permitted to self-monitor physical  
168 activity via self-purchased electronic tracking devices (e.g., Fitbit<sup>®</sup>, Garmin<sup>®</sup>, or Apple Watch<sup>®</sup>).

169 Participants will be encouraged to work toward meeting their daily caloric intake goals by  
170 selecting lower-calorie food options, decreasing consumption of "fast food," decreasing or  
171 eliminating sugar-sweetened beverages, increasing consumption of fruits, vegetables, and  
172 whole grains, and using lower-fat methods of preparing foods. Weight-loss treatment modules  
173 included instruction on the USDA's *MyPlate* to emphasize choosing whole grains, fruits,  
174 vegetables, lean meat, and low-fat dairy products [51].

175 Walking will be the primary form of prescribed physical activity. During week 2, each  
176 participant's steps will be monitored over 7 days, and the participants will then be encouraged to  
177 gradually increase their planned daily walking time by 5-10 minutes (i.e., 500-1000 steps) each  
178 week as tolerated until they reach an average of 30 minutes/day (3000 steps) above their  
179 baseline level. Participants who achieve this objective will be encouraged to further increase  
180 their steps toward an ultimate goal of 60 min/day of walking for exercise (i.e., 6000 steps above  
181 baseline).

## 182 **2.6. Phase II Randomization and Extended-Care Lifestyle Intervention**



183 To maximize participation in the randomized and follow-up phases (II and III) of the trial,  
184 only those individuals who attend fewer than 50% of the Phase I sessions will be excluded from  
185 advancing to Phase II randomized assignments. All other participants, regardless of initial  
186 weight loss achieved, will be randomly assigned to one of the three Phase II conditions (GRP,  
187 IND, or CTRL). Randomization was completed by the study statistician (MJD) using the random  
188 number generator in R statistical computing software [57]. County size, county, Phase I group,  
189 and session time will be balanced during randomization. Interventionists will notify participants  
190 of their Phase II group assignment during the last Phase I session. The primary objectives of  
191 Phase II (Months 5-16) are to sustain the lifestyle changes accomplished in Phase I so as to  
192 maintain lost weight and to make further adjustments in energy balance to produce additional  
193 weight loss during “campaigns” conducted in Months 8-9 and Months 13-14.

194 The mode of extended-care contacts will differ by condition during Phase II, but the  
195 schedule of contacts is consistent across the conditions. Intervention contact across all three  
196 conditions will occur bi-weekly during Month 5 through 10 and monthly during Months 11  
197 through 16. At each of the scheduled contact points, participants in all three conditions receive  
198 a weight-loss treatment module delivered via e-mail or U.S. mail with information and  
199 recommended behavioral activities targeted at maintaining lost weight. All participants will also  
200 be provided with a supply of blank self-monitoring logs and pre-paid mailers for returning  
201 completed dietary logs to the interventionists.

#### 202 **2.6.1. GRP condition**

203 Participants randomized to the GRP condition will call into a teleconference line for 60-  
204 minute group sessions with the interventionist and other members from their Phase I group.  
205 The calls will include three primary components: (1) a group “check-in” during which participants  
206 report progress toward goals and problems experienced since the previous session coupled  
207 with group problem solving of one or two complex issues to address barriers to progress [49];  
208 (2) group discussion of the treatment module with the interventionist explaining new objectives

209 and suggesting behavioral strategies to achieve those objectives; and (3) structured individual  
210 goal setting with respect to each participant's plans for diet and/or physical activity changes to  
211 be accomplished prior to the next session. To maximize the time efficiency of the group  
212 session, all participants will be asked to identify their calorie and step goals *prior* to the call.

213 The group problem-solving activities facilitated by the interventionist during the  
214 extended-care sessions will incorporate the use of an evidence-based, five-step model [49,50]  
215 including: (1) orientation (i.e., developing an appropriate coping perspective -- "Problems are a  
216 normal part of managing your weight, but they can be dealt with effectively."); (2) definition (i.e.,  
217 specifying the problem and goal behaviors -- "What is the particular problem facing you right  
218 now? What is your goal in this situation?"); (3) generation of alternatives (i.e., brainstorming  
219 potential solutions -- "The greater the range of possible solutions you consider, the greater your  
220 chances of developing an effective solution."); (4) decision making (i.e., anticipating the  
221 probable outcomes of different options -- "What are the likely short- and long-term  
222 consequences of each of your options?"; and (5) implementation and evaluation (i.e., trying out  
223 a plan and evaluating its effectiveness -- "What solution plan are you going to try and how will  
224 you know if it works?").

### 225 **2.6.2. IND condition**

226 Participants randomized to the IND condition call into a teleconference line at a  
227 predetermined appointment time for a one-on-one, 10- to 20-minute session with the  
228 interventionist. Participants will be contacted to schedule make-up calls in the event of time  
229 conflicts or missed calls. Aside from the difference in call length and the absence of other group  
230 members, IND calls will include the same structure, components, and problem-solving focus of  
231 the GRP calls.

### 232 **2.6.3. CTRL condition**

233 Participants in the CTRL group will receive a series of 18 written educational weight-loss  
234 treatment modules delivered via e-mail and/or U.S. mail delivered on the same schedule as the

235 GRP and IND contacts during Phase II. The modules will include the identical content used in  
236 the GRP and IND conditions. The CTRL condition will not include any scheduled phone or in-  
237 person interactions with the interventionists or other participants.

## 238 **2.7. Measures**

### 239 **2.7.1. Assessment visits**

240 Study personnel masked to participant randomization will conduct in-person assessment  
241 visits at baseline and at Months 4, 10, 16, and 22. Assessment visits will be conducted at the  
242 same local CES site for all time points. Self-reported medical history and a list of medications  
243 will be updated at each assessment visit.

### 244 **2.7.2. Anthropometrics**

245 At baseline, height will be measured using a stadiometer (ShorrBoard<sup>®</sup>), with  
246 participant's shoes removed. At baseline and subsequent assessment visits, weight will be  
247 measured with a calibrated digital scale (Tanita BWB-800S), with participants in light indoor  
248 clothing, pockets emptied, and shoes removed.

### 249 **2.7.3. Fasting blood samples**

250 Fasting blood samples will be obtained by the study nurse at baseline and at Months 4  
251 and 22 and analyzed for metabolic and lipid profiles by Quest Diagnostics<sup>®</sup>.

### 252 **2.7.4. Resting blood pressure and heart rate**

253 Blood pressure and heart rate will be measured at baseline and Months 4 and 22.  
254 Measurements will be taken while the participant is seated with feet resting on the floor for five  
255 minutes in a quiet room free of distractions. Resting systolic and diastolic blood pressure will be  
256 taken three times, two minutes apart, using a Dinamap<sup>®</sup> Automated Vital Signs Monitor with  
257 appropriate cuff size; the second and third readings will be entered and averaged in the study  
258 database.

### 259 **2.7.5. 400 Meter Walk Test**

260 The 400 Meter Walk Test [58], a standardized measure of physical fitness commonly  
261 used to assess individuals with chronic health conditions, will be completed at baseline, and at  
262 Months 4 and 22 to assess fitness.

### 263 **2.7.6. Participant questionnaires**

264 The following questionnaires will be completed by the participants at baseline and at  
265 Months 4, 10, 16, and 22.

#### 266 **2.7.6.1. Paffenbarger Physical Activity Questionnaire**

267 Self-reported physical activity will be collected via the Paffenbarger Physical Activity  
268 Questionnaire [59], which includes questions on distance walked, flights of stairs climbed, and  
269 time spent in other sports, recreational, or fitness activities during a typical day or week.

#### 270 **2.7.6.2. Medical Outcomes Study 36-Item Short Form Health Survey (SF-36)**

271 The SF-36 [60] is a quality-of-life measure that assesses the following domains: (a)  
272 physical functioning; (b) role limitations due to physical health; (c) bodily pain; (d) general  
273 health; (e) vitality; (f) social functioning; (g) role limitations due to emotional problems; and (h)  
274 mental health [61].

#### 275 **2.7.6.3. Social Problem-Solving Inventory-Revised (SPSI-R)**

276 The SPSI-R [62-64] is a 52-item questionnaire that evaluates positive versus negative  
277 problem orientation and problem-solving style.

#### 278 **2.7.6.4. Social Provisions Scale**

279 The 24-item Social Provisions Scale [65,66] measures perceived support from others in  
280 one's social network.

#### 281 **2.7.6.5. Cost Analysis Questionnaire**

282 The cost analysis questionnaire [35] assesses direct and indirect costs of lifestyle  
283 interventions.

#### 284 **2.7.6.6. Health Thermometer**

285 The Health Thermometer is a visual analog scale [67] that measures health-related  
286 quality of life on a scale of 0 to 100 with 0 indicating the “worst imaginable health state” to 100  
287 indicating the “best imaginable health state.”

#### 288 **2.7.6.7. Program Satisfaction and Group Leader Evaluation Forms**

289 Participant ratings of program satisfaction, the usefulness of specific treatment strategies  
290 (e.g., self-monitoring, cognitive restructuring, etc.), and the effectiveness of interventionists are  
291 completed at Months 4, 10, 16, and 22.

### 292 **2.8. Participant Retention Strategies**

293 Participants will receive payments on a study-provided credit card of \$50 upon  
294 completion of the Month 4 visit, \$20 upon the completion of the Month 10 and Month 16 visits,  
295 and \$75 upon completion of the Month 22 visit. Participants will also receive \$10 as travel  
296 reimbursement for each of the in-person sessions attended during Phase I.

### 297 **2.9. Data Management and Statistical Analyses**

#### 298 **2.9.1. Data management**

299 Data will be stored in a database via the Research Electronic Data Capture (REDCap)  
300 system [68], a secure web-based data management system supported by the University of  
301 Florida Clinical and Translational Science Institute. Self-report data will be entered directly by  
302 participants into REDCap’s online survey module. All other data will be entered by study  
303 personnel according to the protocol and in compliance with the U.S. Health Insurance Portability  
304 and Accountability (HIPAA) Privacy Rule. Data will be exported to a SAS dataset for statistical  
305 analyses [69].

#### 306 **2.9.2. Missing data**

307 Data analyses for this effectiveness trial will be performed using an intent-to-treat  
308 approach that includes all randomized participants. It will be assumed that individuals who  
309 discontinue participation in the study prior to Month 22 regained weight, on average, at a rate of  
310 0.3 kg per month after leaving the study, up to their baseline weight. This conservative

311 approach to imputing missing weight values has been employed by numerous prior studies  
312 [34,35,70] and is consistent with published reviews of weight regain following lifestyle treatment  
313 for obesity [18,71,72]. We will also consider missing at random. Sensitivity to the assumptions  
314 about the missing data [75] will be examined in our final analysis.

### 315 **2.9.3. Sample size justification**

316 The primary outcome will be change in body weight from Month 4 to Month 22,  
317 comparing the GRP and IND phone-based conditions to the education CTRL condition. It is  
318 assumed that the county size, county, and session time effects will be negligible due to the  
319 balance in the randomization assignments. The analysis will, however, take into account a  
320 random effect that allows for correlation among individuals in the same GRP sessions. Based  
321 upon prior studies [35,76], a 20% attrition rate is expected by Month 22. The recruitment target  
322 includes a total of 540 individuals entering Phase I (180 per condition). Power calculations were  
323 computed using the expected attrition rate and a Bonferroni adjustment to account for  
324 comparisons of the three treatment conditions. The study is expected to have > 80% power  
325 (two-sided tests, type I error rate of 0.05) to detect a 2.5 kg difference in regain from Month 4 to  
326 Month 22 between GRP vs. CTRL and IND vs. CTRL.

### 327 **2.9.4. Primary analyses**

328 Participants' weight change will be calculated as the difference between weight in  
329 kilograms at Month 22 and weight at Month 4. The primary hypothesis is that both the GRP and  
330 IND telephone conditions will produce greater weight reductions at Month 22 than the education  
331 CTRL condition. To test this hypothesis, we will employ the NiNBayes R package  
332 ([github.com/theodds/NiNBayes](https://github.com/theodds/NiNBayes)), which models the weights longitudinally using a Dirichlet  
333 process mixture of models.[77] Treatment condition is randomly assigned. Two primary  
334 contrasts of interest will be tested for significance: GRP vs. CTRL and IND vs. CTRL.  
335 Bonferroni corrections will be used to control for type I error. In addition, percent change in body

336 weight during months 4 to 22 will be analyzed by computing percent changes in body weight  
337 from the models used for the primary outcome, weight change.

### 338 **2.9.5. Secondary analyses**

339 For the secondary aim, the outcomes of interest are the proportions of participants within  
340 a treatment condition who lost  $\geq 5\%$  and  $\geq 10\%$  of body weight at Month 22. It is hypothesized  
341 that both the GRP and IND conditions will result in greater proportions of participants with  $\geq 5\%$   
342 and  $\geq 10\%$  losses at Month 22 than the CTRL condition. Two contrasts will be tested for  
343 significance: GRP vs. CTRL and IND vs. CTRL. Based on the Bayesian approach for the  
344 primary outcome and missingness, for each contrast, we will test the null hypothesis that the  
345 relevant proportions are equal versus the alternative that they are not equal.

### 346 **2.9.6. Additional analyses**

347 **2.9.6.1. Exploratory analyses.** Changes from Month 4 to Month 22 will be examined  
348 for systolic and diastolic blood pressure, resting heart rate, blood lipids profile (LDL and HDL  
349 cholesterol and triglycerides), glycemic control (HbA1c), dietary intake, self-reported physical  
350 activity, physical performance (400 Meter Walk Test [58]), and health-related quality of life.  
351 Process measures will include intervention-related activities (e.g., attendance, self-monitoring)  
352 and participants' evaluation of program components and interventionist effectiveness. These  
353 endpoints are continuous variables, and analyses will be the same as that described for the  
354 primary endpoint. No adjustments will be made for multiple comparisons due to the exploratory  
355 nature of these analyses.

356 **2.9.6.2. Mediator analysis.** Adherence to caloric intake goals will be evaluated as a  
357 mediator of the relationship between the intervention conditions and weight change at Month 22.  
358 Causal mediation analyses will be conducted using the mediate function from the mediation R  
359 package [78].

360 **2.9.6.4. Cost-effectiveness analyses.** The analytic framework will follow the guidelines  
361 of the Second Panel on Cost-Effectiveness in Health and Medicine [79]. Costs of each condition

362 will be tracked from the service provider perspective [35]. Cost effectiveness will be measured  
363 primarily as “dollars per kg loss per treatment condition” [80]. Cost effectiveness will also be  
364 measured according to the recommended clinical cut-points of maintaining  $\geq 5\%$  loss of initial  
365 weight [15]. Similar effectiveness for the GRP and IND conditions are expected, with lower  
366 effectiveness in the CTRL condition. Cost effectiveness will also be assessed based on Quality-  
367 Adjusted Life Year (QALY) gains related to weight change and will be calculated using data  
368 from the SF-36 questionnaires completed at baseline, Month 4, Month 16, and Month 22 to  
369 derive a preference score using the Short Form-6 Dimension (SF6D) method; 10 items from the  
370 SF-36 are used to calculate a QALY score [81].

371 Incremental cost effectiveness ratios (ICERs) will identify the differential costs and  
372 outcomes of switching from individual to group-based telephone counseling. A priori, it is  
373 expected that the GRP condition will be less expensive than the IND condition but with similar  
374 effectiveness. All costs will be adjusted to reflect constant 2017 dollars. Sensitivity analyses  
375 will be conducted to determine whether costs and cost-effectiveness estimates are sensitive to  
376 study-specific wage rates and other program costs. Extrapolation using sample median wage  
377 rates or national wage data will be calculated and the analysis will be rerun to determine any  
378 change in results. Additional sensitivity analyses will rely on either probabilistic models or  
379 tornado charts to gauge whether ICER results depend on various model assumptions.

380



381 **References**

- 382 1. Befort CA, Nazir N, Perri MG. Prevalence of obesity among adults from rural and urban  
383 areas of the United States: Findings from NHANES (2005-2008). *J Rural Health*.  
384 2012;28(4):392-7. <https://doi.org/10.1111/j.1748-0361.2012.00411.x>
- 385 2. Lundeen EA, Park S, Pan L, O'Toole T, Matthews K, Blanck HM. Obesity prevalence  
386 among adults living in metropolitan and nonmetropolitan counties-United States, 2016.  
387 *MMWR Morb Mortal Wkly Rep*. 2018;67(23):653-58.  
388 <https://doi.org/10.15585/mmwr.mm6723a1>
- 389 3. Hales CM, Fryar CD, Carroll MD, Freedman DS, Aoki Y, Ogden CL. Differences in  
390 obesity prevalence by demographic characteristics and urbanization level among adults  
391 in the United States, 2013-2016. *JAMA*. 2018;319(23):2419-29.  
392 <https://doi.org/10.1001/jama.2018.7270>
- 393 4. Wen M, Fan JX, Kowaleski-Jones L, Wan N. Rural-urban disparities in obesity  
394 prevalence among working age adults in the United States: Exploring the mechanisms.  
395 *Am J Health Promot*. 2018;32(2):400-08. <https://doi.org/10.1177/0890117116689488>
- 396 5. Knudson A, Meit, M., Tanenbaum, E., Brady, J., Gilbert, T., Klug, et al. 2016, March;  
397 Available from: [https://ruralhealth.und.edu/projects/health-reform-policy-research-  
398 center/pdf/technical-notes-exploring-rural-urban-mortality-differences.pdf](https://ruralhealth.und.edu/projects/health-reform-policy-research-center/pdf/technical-notes-exploring-rural-urban-mortality-differences.pdf).
- 399 6. Moy E. Leading causes of death in nonmetropolitan and metropolitan areas-United  
400 States, 1999–2014. *MMWR Surveillance Summary*; 2017; 66: Available from:  
401 <http://www.cdc.gov/mmwr/volumes/66/ss/ss6601a1.htm>.
- 402 7. Jones CP, TS; Ahearn, M.; et al. Health status and healthcare access of farm and rural  
403 populations. United States Department of Agriculture Economic Research Service, 2009.
- 404 8. Martin SL, Kirkner GJ, Mayo K, Matthews CE, Durstine JL, Hebert JR. Urban, rural, and  
405 regional variations in physical activity. *J Rural Health*. 2005;21(3):239-44.
- 406 9. Patterson PD, Moore CG, Probst JC, Shinogle JA. Obesity and physical inactivity in rural  
407 America. *J Rural Health*. 2004;20(2):151-9.
- 408 10. Rural Healthy People 2020: A Companion Document to Healthy People 2020, volume 1.  
409 Texas A&M University Health Science Center, School of Public Health, Southwest Rural  
410 Health Research Center, 2015.
- 411 11. Flora CB, Flora, JL, & Gasteyer, SP. Rural communities: Legacy + change. Boulder,  
412 Colorado: Westview Press; 2015.
- 413 12. Lutfiyya MN, Chang LF, Lipsky MS. A cross-sectional study of US rural adults'  
414 consumption of fruits and vegetables: Do they consume at least five servings daily?  
415 *BMC Public Health*. 2012;12:280. <https://doi.org/10.1186/1471-2458-12-280>
- 416 13. Pearson TA, Lewis C. Rural epidemiology: Insights from a rural population laboratory.  
417 *Am J Epidemiol*. 1998;148(10):949-57.
- 418 14. McTigue KM, Harris R, Hemphill B, Lux L, Sutton S, Bunton AJ, et al. Screening and  
419 interventions for obesity in adults: Summary of the evidence for the U.S. Preventive  
420 Services Task Force. *Ann Intern Med*. 2003;139(11):933-49.
- 421 15. Jensen MD, Ryan DH, Apovian CM, Ard JD, Comuzzie AG, Donato KA, et al. 2013  
422 AHA/ACC/TOS guideline for the management of overweight and obesity in adults: A  
423 report of the American College of Cardiology/American Heart Association Task Force on  
424 Practice Guidelines and The Obesity Society. *Circulation*. 2014;129(25 Suppl 2):S102-  
425 38. <https://doi.org/10.1161/01.cir.0000437739.71477.ee>
- 426 16. Butryn ML, Webb V, Wadden TA. Behavioral treatment of obesity. *Psychiatr Clin North*  
427 *Am*. 2011;34(4):841-59. <https://doi.org/10.1016/j.psc.2011.08.006>
- 428 17. Wing RR. Behavioral weight control. *Handbook of obesity treatment*. New York, NY:  
429 Guilford Press; 2002: 301-316.

- 430 18. Wadden TA, Butryn ML, Wilson C. Lifestyle modification for the management of obesity.  
431 *Gastroenterology*. 2007;132(6):2226-38. <https://doi.org/10.1053/j.gastro.2007.03.051>
- 432 19. Johnston CA, Tyler C, Foreyt JP. Behavioral management of obesity. *Curr Atheroscler*  
433 *Rep*. 2007;9(6):448-53.
- 434 20. Vetter ML, Faulconbridge LF, Webb VL, Wadden TA. Behavioral and pharmacologic  
435 therapies for obesity. *Nat Rev Endocrinol*. 2010;6(10):578-88.  
436 <https://doi.org/10.1038/nrendo.2010.121>
- 437 21. Chen L, Pei JH, Kuang J, Chen HM, Chen Z, Li ZW, et al. Effect of lifestyle intervention  
438 in patients with type 2 diabetes: A meta-analysis. *Metabolism*. 2015;64(2):338-47.  
439 <https://doi.org/10.1016/j.metabol.2014.10.018>
- 440 22. Lin JS, O'Connor E, Evans CV, Senger CA, Rowland MG, Groom HC. Behavioral  
441 counseling to promote a healthy lifestyle in persons with cardiovascular risk factors: A  
442 systematic review for the U.S. Preventive Services Task Force. *Ann Intern Med*.  
443 2014;161(8):568-78. <https://doi.org/10.7326/M14-0130>
- 444 23. Knowler WC, Barrett-Connor E, Fowler SE, Hamman RF, Lachin JM, Walker EA, et al.  
445 Reduction in the incidence of type 2 diabetes with lifestyle intervention or metformin. *N*  
446 *Engl J Med*. 2002;346(6):393-403. <https://doi.org/10.1056/NEJMoa012512>
- 447 24. van Dis J. Where we live: Health care in rural vs urban America. *JAMA*.  
448 2002;287(1):108-08. [https://doi.org/DOI 10.1001/jama.287.1.108](https://doi.org/DOI%2010.1001/jama.287.1.108)
- 449 25. United States Department of Agriculture. Cooperative Extension System, National  
450 Institute of Food and Agriculture. 2015; Available from: [https://nifa.usda.gov/cooperative-](https://nifa.usda.gov/cooperative-extension-system)  
451 [extension-system](https://nifa.usda.gov/cooperative-extension-system).
- 452 26. Braun B BK, Cronk L, Fox LK, Koukel S, Le Menestrel S et al. Cooperative Extension's  
453 National Framework for Health and Wellness. 2014; Available from:  
454 [http://www.aplu.org/members/commissions/food-environmentand-renewable-](http://www.aplu.org/members/commissions/food-environmentand-renewable-resources/CFERR_Library/national-framework-for-health-and-wellness/file)  
455 [resources/CFERR\\_Library/national-framework-for-health-and-wellness/file](http://www.aplu.org/members/commissions/food-environmentand-renewable-resources/CFERR_Library/national-framework-for-health-and-wellness/file).
- 456 27. Appel LJ, Clark JM, Yeh HC, Wang NY, Coughlin JW, Daumit G, et al. Comparative  
457 effectiveness of weight-loss interventions in clinical practice. *N Engl J Med*.  
458 2011;365(21):1959-68. <https://doi.org/10.1056/NEJMoa1108660>
- 459 28. Bray GA, Wadden TA. Improving long-term weight loss maintenance: Can we do it?  
460 *Obesity (Silver Spring)*. 2015;23(1):2-3. <https://doi.org/10.1002/oby.20964>
- 461 29. Jeffery RW, Drewnowski A, Epstein LH, Stunkard AJ, Wilson GT, Wing RR, et al. Long-  
462 term maintenance of weight loss: Current status. *Health Psychol*. 2000;19(1S):5-16.
- 463 30. Look AHEAD Research Group. Long-term effects of a lifestyle intervention on weight  
464 and cardiovascular risk factors in individuals with type 2 diabetes mellitus: Four-year  
465 results of the Look AHEAD trial. *Arch Intern Med*. 2010;170(17):1566-75.  
466 <https://doi.org/10.1001/archinternmed.2010.334>
- 467 31. Svetkey LP, Stevens VJ, Brantley PJ, Appel LJ, Hollis JF, Loria CM, et al. Comparison  
468 of strategies for sustaining weight loss: The weight loss maintenance randomized  
469 controlled trial. *JAMA*. 2008;299(10):1139-48. <https://doi.org/10.1001/jama.299.10.1139>
- 470 32. Franz MJ, VanWormer JJ, Crain AL, Boucher JL, Histon T, Caplan W, et al. Weight-loss  
471 outcomes: A systematic review and meta-analysis of weight-loss clinical trials with a  
472 minimum 1-year follow-up. *J Am Diet Assoc*. 2007;107(10):1755-67.  
473 <https://doi.org/10.1016/j.jada.2007.07.017>
- 474 33. Look AHEAD Research Group. The Look AHEAD study: A description of the lifestyle  
475 intervention and the evidence supporting it. *Obesity (Silver Spring)*. 2006;14(5):737-52.  
476 <https://doi.org/10.1038/oby.2006.84>
- 477 34. Wing RR, Tate DF, Gorin AA, Raynor HA, Fava JL. A self-regulation program for  
478 maintenance of weight loss. *N Engl J Med*. 2006;355(15):1563-71.  
479 <https://doi.org/10.1056/NEJMoa061883>

- 480 35. Perri MG, Limacher MC, Durning PE, Janicke DM, Lutes LD, Bobroff LB, et al.  
481 Extended-care programs for weight management in rural communities: The Treatment of  
482 Obesity in Underserved Rural Settings (TOURS) randomized trial. *Arch Intern Med.*  
483 2008;168(21):2347-54. <https://doi.org/10.1001/archinte.168.21.2347>  
484 36. Befort CA, Donnelly JE, Sullivan DK, Ellerbeck EF, Perri MG. Group versus individual  
485 phone-based obesity treatment for rural women. *Eat Behav.* 2010;11(1):11-7.  
486 <https://doi.org/10.1016/j.eatbeh.2009.08.002>  
487 37. Befort CA, Klemp JR, Sullivan DK, Shireman T, Diaz FJ, Schmitz K, et al. Weight loss  
488 maintenance strategies among rural breast cancer survivors: The rural women  
489 connecting for better health trial. *Obesity (Silver Spring).* 2016;24(10):2070-7.  
490 <https://doi.org/10.1002/oby.21625>  
491 38. Donnelly JE, Goetz J, Gibson C, Sullivan DK, Lee R, Smith BK, et al. Equivalent weight  
492 loss for weight management programs delivered by phone and clinic. *Obesity (Silver*  
493 *Spring).* 2013;21(10):1951-9. <https://doi.org/10.1002/oby.20334>  
494 39. United States Census Bureau. *Geography: Urban and rural.* 2016; Available from:  
495 <https://www.census.gov/geo/reference/urban-rural.html>  
496 40. United States Health and Human Services. Health professional shortage areas of  
497 primary care, dental care, or mental health providers. 2018; Available from:  
498 <http://hpsafind.hrsa.gov/HPSASearch>.  
499 41. Obesity: Preventing and managing the global epidemic. Report of a WHO consultation.  
500 World Health Organ Tech Rep Ser. 2000;894:i-xii, 1-253.  
501 42. Diabetes Prevention Program Research Group. Design and methods for a clinical trial in  
502 the prevention of type 2 diabetes. *Diabetes Care.* 1999;22(4):623-34.  
503 43. Diabetes Prevention Program Research Group. The Diabetes Prevention Program  
504 (DPP): Description of lifestyle intervention. *Diabetes Care.* 2002;25(12):2165-71.  
505 44. Renjilian DA, Perri MG, Nezu AM, McKelvey WF, Shermer RL, Anton SD. Individual  
506 versus group therapy for obesity: Effects of matching participants to their treatment  
507 preferences. *J Consult Clin Psychol.* 2001;69(4):717-21.  
508 45. Perri MG, Martin AD, Leermakers EA, Sears SF, Notelovitz M. Effects of group- versus  
509 home-based exercise in the treatment of obesity. *J Consult Clin Psychol.*  
510 1997;65(2):278-85.  
511 46. Bandura A. *Social Foundations of Thought and Action: A Social Cognitive Theory.*  
512 Englewood Cliffs, NJ: Prentice-Hall; 1986.  
513 47. Bandura A. *Self-efficacy: The Exercise of Control.* New York, NY: W.H. Freeman and  
514 Company; 1997.  
515 48. Kanfer, FH, Gaelick-Buys, L. Self-management methods. Pergamon general psychology  
516 series, Vol. 52. *Helping people change: A textbook of methods.* Elmsford, NY: Pergamon  
517 Press, 1991: 305-360.  
518 49. Perri MG, Nezu AM, McKelvey WF, Shermer RL, Renjilian DA, Viegner BJ. Relapse  
519 prevention training and problem-solving therapy in the long-term management of  
520 obesity. *J Consult Clin Psychol.* 2001;69(4):722-6.  
521 50. Perri MG, Nezu AM, Viegner BJ. *Improving the long-term management of obesity:*  
522 *Theory, research, and clinical guidelines.* New York: Wiley; 1992.  
523 51. United States Department of Agriculture. *Choose MyPlate.* 2018; Available from:  
524 <https://www.choosemyplate.gov>  
525 52. United States Department of Health and Human Services, Department of Agriculture,  
526 Dietary Guidelines Advisory Committee. *Dietary Guidelines for Americans, 2010.*  
527 *Seventh edition.* Washington, D.C.  
528 53. United States Department of Health and Human Services, Department of Agriculture,  
529 Dietary Guidelines Advisory Committee. *Dietary Guidelines for Americans, 2015-2020.*  
530 *Eighth edition.* Washington, D.C.

- 531 54. Donnelly JE, Blair SN, Jakicic JM, Manore MM, Rankin JW, Smith BK, et al. American  
532 College of Sports Medicine Position Stand. Appropriate physical activity intervention  
533 strategies for weight loss and prevention of weight regain for adults. *Med Sci Sports*  
534 *Exerc.* 2009;41(2):459-71. <https://doi.org/10.1249/MSS.0b013e3181949333>
- 535 55. Borushek A. *The Calorie King Calorie, Fat, & Carbohydrate Counter*. 2014 ed. Costa  
536 Mesa, CA: Family Health Publications; 2014.
- 537 56. Borushek A. *The Calorie King Calorie, Fat, & Carbohydrate Counter*. 2017 ed. Costa  
538 Mesa, CA: Family Health Publications; 2017.
- 539 57. R Core Team. *R: A language and environment for statistical computing*. R Foundation  
540 for Statistical Computing, Vienna, Austria. 2017.
- 541 58. Simonsick EM, Montgomery PS, Newman AB, Bauer DC, Harris T. Measuring fitness in  
542 healthy older adults: The Health ABC Long Distance Corridor Walk. *J Am Geriatr Soc.*  
543 2001;49(11):1544-8.
- 544 59. Paffenbarger RS, Jr., Blair SN, Lee IM, Hyde RT. Measurement of physical activity to  
545 assess health effects in free-living populations. *Med Sci Sports Exerc.* 1993;25(1):60-70.
- 546 60. Jenkinson C, Wright L, Coulter A. Criterion validity and reliability of the SF-36 in a  
547 population sample. *Qual Life Res.* 1994;3(1):7-12.
- 548 61. American Psychological Association. *Medical Outcomes Scale*. n.d.; Available from:  
549 [http://www.apa.org/pi/about/publications/caregivers/practice-](http://www.apa.org/pi/about/publications/caregivers/practice-settings/assessment/tools/medical-outcomes.aspx)  
550 [settings/assessment/tools/medical-outcomes.aspx](http://www.apa.org/pi/about/publications/caregivers/practice-settings/assessment/tools/medical-outcomes.aspx).
- 551 62. Maydeu-Olivares A, & Dzurilla, T. J. A factor-analytic study of the Social Problem-  
552 Solving Inventory: An integration of theory and data. *Cognitive Therapy and Research.*  
553 1996;20(2):115-33.
- 554 63. Shewchuk RM, Johnson MO, Elliott TR. Self-appraised social problem solving abilities,  
555 emotional reactions and actual problem solving performance. *Behav Res Ther.*  
556 2000;38(7):727-40.
- 557 64. D'Zurilla TJ NA, Maydeu-Olivares A. *Social Problem-Solving Inventory-Revised:*  
558 *Technical manual*. North Tonawanda, NY: Multi-Health Systems; 2002.
- 559 65. Cutrona CE. Objective determinants of perceived social support. *J Pers Soc Psychol.*  
560 1986;50(2):349-55.
- 561 66. Cutrona CE, & Russell, D. W. *The provisions of social relationships and adaptation to*  
562 *stress*. Greenwich, CT: JAI Press; 1987.
- 563 67. Llach XB, Herdman M, Schiaffino A. Determining correspondence between scores on  
564 the EQ-5D "thermometer" and a 5-point categorical rating scale. *Med Care.*  
565 1999;37(7):671-77. <https://doi.org/Doi.10.1097/00005650-199907000-00007>
- 566 68. Harris PA, Taylor R, Thielke R, Payne J, Gonzalez N, Conde JG. Research electronic  
567 data capture (REDCap)--a metadata-driven methodology and workflow process for  
568 providing translational research informatics support. *J Biomed Inform.* 2009;42(2):377-  
569 81. <https://doi.org/10.1016/j.jbi.2008.08.010>
- 570 69. SAS Institute Inc. *SAS/ACCESS® 9.4 Interface to ADABAS*. Cary, NC: SAS Institute  
571 Inc.; 2013.
- 572 70. Wadden TA, Berkowitz RI, Womble LG, Sarwer DB, Phelan S, Cato RK, et al.  
573 Randomized trial of lifestyle modification and pharmacotherapy for obesity. *N Engl J*  
574 *Med.* 2005;353(20):2111-20. <https://doi.org/10.1056/NEJMoa050156>
- 575 71. Olson K, Bond D, Wing RR. Behavioral approaches to the treatment of obesity. *R I Med*  
576 *J.* 2017;100(2):21-24.
- 577 72. Perri MG, Corsica JA. Improving the maintenance of weight lost in behavioral treatment  
578 of obesity. *Handbook of Obesity Treatment.* 2002 Jan 9;1:357-79.
- 579 73. Daniels MJ, Hogan JW. Reparameterizing the pattern mixture model for sensitivity  
580 analyses under informative dropout. *Biometrics.* 2000;56(4):1241-8.

- 581 74. Little RJ. A class of pattern-mixture models for normal incomplete data. *Biometrika*.  
582 1994;81(3):471-83.
- 583 75. Daniels MJ, Hogan JW. *Missing data in longitudinal studies: Strategies for bayesian*  
584 *modeling and sensitivity analysis*. Boca Raton: Chapman & Hall/CRC; 2008.
- 585 76. Perri MG, Limacher MC, von Castel-Roberts K, Daniels MJ, Durning PE, Janicke DM, et  
586 al. Comparative effectiveness of three doses of weight-loss counseling: Two-year  
587 findings from the Rural LITE trial. *Obesity (Silver Spring)*. 2014;22(11):2293-300.  
588 <https://doi.org/10.1002/oby.20832>
- 589 77. Daniels MJ, Hogan JW. *Missing Data in Longitudinal Studies: Strategies for Bayesian*  
590 *Modeling and Sensitivity Analysis*. Chapman and Hall/CRC; 2008.
- 591 78. Imai K, Keele L, Yamamoto T. Identification, inference, and sensitivity analysis for causal  
592 mediation effects. *Statistical Science* 2010;25(1):51-71.  
593 <http://www.jstor.org/stable/41058997>.
- 594 79. Sanders GD, Neumann PJ, Basu A, Brock DW, Feeny D, Krahn M, et al.  
595 Recommendations for conduct, methodological practices, and reporting of cost-  
596 effectiveness analyses: Second panel on cost-effectiveness in health and medicine.  
597 *JAMA*. 2016;316(10):1093-103. <https://doi.org/10.1001/jama.2016.12195>
- 598 80. Institute of Medicine. *Weighing the Options: Criteria for Evaluating Weight-Management*  
599 *Programs*. Thomas PR, ed. Washington, DC: National Academies Press; 1995.
- 600 81. Brazier J, Roberts J, Deverill M. The estimation of a preference-based measure of health  
601 from the SF-36. *J Health Econ*. 2002;21(2):271-92.  
602  
603

**Table 1**

Weight-loss treatment modules.

| Session | Topic                                                           | Objective                                                                                                                        |
|---------|-----------------------------------------------------------------|----------------------------------------------------------------------------------------------------------------------------------|
| 1       | Getting Started for Success: Setting Goals                      | Review energy balance and weight management. Set personal calorie intake goals.                                                  |
| 2       | Taking Control of Eating Patterns                               | Learn difference between hunger vs. cravings. Review strategies to implement healthy eating patterns.                            |
| 3       | Stepping Up: Becoming Active                                    | Review benefits of physical activity. Set personal step goals.                                                                   |
| 4       | Becoming a Fat Gram Detective/Southern Cooking Made Healthier   | Understand roles of fat, traditional Southern foods, and calories in long-term weight management. Review lower-fat food options. |
| 5       | Building a Healthy Diet                                         | Review MyPlate recommended servings for each food group. Set total daily food serving goals.                                     |
| 6       | Keep on Moving!                                                 | Discuss benefits of exercise/aerobic fitness and safety.                                                                         |
| 7       | Scheduling Sleep                                                | Identify current sleep habits and learn how sleep affects health and weight. Discuss sleep hygiene strategies.                   |
| 8       | Taking Charge: Eating and Activity Cues                         | Discuss triggers/cues for eating and physical activity. Discuss method to modify problematic eating and activity cues.           |
| 9       | An Introduction to Problem Solving                              | Discuss steps in Problem Solving model and how to apply them to current and future problems.                                     |
| 10      | Talking Back to Negative Thoughts                               | Discuss common weight-related negative thoughts and patterns. Demonstrate how to “talk back” to negative thoughts.               |
| 11      | Slipping but not Falling: Preventing Relapse                    | Identify risk factors for experiencing a slip. Create a plan to prevent slips from becoming a relapse.                           |
| 12      | Coping with High-Risk Situations and Eating Out the Healthy Way | Identify high-risk situations, challenges faced, and coping strategies. Demonstrate how to budget calories for eating out.       |
| 13      | Social Support and Making Social Cues Work for You              | Discuss strategies for building social support and ways to effectively manage social cues.                                       |
| 14      | Managing Stress                                                 | Discuss causes and effects related to stress. Introduce healthy strategies for stress reduction.                                 |
| 15      | Having a Positive Body Image and Dealing with Plateaus          | Discuss facts about body image and plateaus. Review tools for overcoming plateaus.                                               |
| 16      | Looking Forward: Planning Ahead                                 | Review current progress and discuss future goals.                                                                                |
| 17      | Phase II Program Goals: Food Tracking Review                    | Review positive changes made, goal setting, and importance of accurate food tracking.                                            |

|    |                                            |                                                                                                                                         |
|----|--------------------------------------------|-----------------------------------------------------------------------------------------------------------------------------------------|
| 18 | Tools for More Effective Problem Solving   | Review problem solving model and apply to a current problem.                                                                            |
| 19 | Meal Mastery: Build a Better Meal          | Review benefits of planning ahead for meals. Identify small changes that can reduce calories in a meal.                                 |
| 20 | Time for Health                            | Discuss importance of budgeting time for exercise. Set goals and problem solve how to make time for activity.                           |
| 21 | Plateau Busting                            | Review information about plateaus. Discuss ways to address a plateau.                                                                   |
| 22 | Travel Triumphantly!                       | Identify barriers to healthy eating and activity while traveling.                                                                       |
| 23 | Nutrition and Exercise During Illness      | Identify strategies for overcoming illness by modifying physical activity and incorporating nutritious foods.                           |
| 24 | Super Sneakers, Stretching, and Safety     | Identify appropriate footwear, clothing, and stretching techniques for physical activity.                                               |
| 25 | Nutrition Myth Busters                     | Identify myths related to nutrition and healthy eating.                                                                                 |
| 26 | Planning Challenge: Perfectly Prepared     | Review 7-day meal planning worksheet and strategies to prepare meals at home during busy times.                                         |
| 27 | Planning Challenge: Food Swaps             | Identify lower calorie substitutes for high calorie food, beverages, and ingredients.                                                   |
| 28 | Fitness Challenge: Hike the Himalayas      | Identify barriers preventing planned exercise and problem solving strategies to overcome them.                                          |
| 29 | Preventing Chronic Disease                 | Identify lifestyle changes that could prevent chronic diseases and problem solve strategies to implement them.                          |
| 30 | Mind Challenge: Empowering Emotions        | Discuss how to positively manage emotions and review ways to relieve stress.                                                            |
| 31 | Life Lessons: Renewing Your Vows           | Identify ways to overcome stress and maintain positive changes. Identify ways to modify goals and stick to them during stressful times. |
| 32 | Life Lessons: Reaching New Heights         | Discuss strategies to keep healthy eating and physical activity exciting.                                                               |
| 33 | Mastering Maintenance and Continuing Goals | Review strategies from National Weight Control Registry. Discuss SMART goals.                                                           |
| 34 | Reflection and Planning for the Next Step  | Reflect on healthy lifestyle changes made throughout the program. Review the importance of self-monitoring and problem solving.         |
