# Supplementary material for: Effect of Telehealth Extended Care for Maintenance of Weight Loss in Rural US Communities: A Randomized Clinical Trial
Source: PubMed Central journal article supplement (PMC7296388; doi:10.1001/jamanetworkopen.2020.6764), 2020-06-15
Supplement: jamanetwopen-3-e206764-s002.pdf [file jamanetwopen-3-e206764-s002.pdf]

## Data Sharing Statement

Perri. Effect of Telehealth Extended Care for Maintenance of Weight Loss in Rural US Communities. *JAMA Netw Open*. Published June 15, 2020. 10.1001/jamanetworkopen.2020.6764

### Data

**Data available:** Yes

**Data types:** Deidentified participant data, Data dictionary

**How to access data:** Requests for data should be sent to Michael G. Perri; email address is [mperri@ufl.edu](mailto:mperri@ufl.edu)

**When available:** With publication

### Supporting Documents

**Document types:** None

### Additional Information

**Who can access the data:** Data will be made available to researchers whose proposed use of the data has been approved.

**Types of analyses:** Systematic reviews and meta-analyses

**Mechanisms of data availability:** The data will be made available with investigator support after approval of a proposal and a signed data access agreement.
